# Supplementary material for: Antisense oligonucleotide silencing of FUS expression as a therapeutic approach in amyotrophic lateral sclerosis
Source: PubMed Central journal article supplement (PMC8799464; doi:10.1038/s41591-021-01615-z), 2022-01-24

Uncropped images of Western blots.

Figure 4a. Ponceau stain and uncropped Western blots.

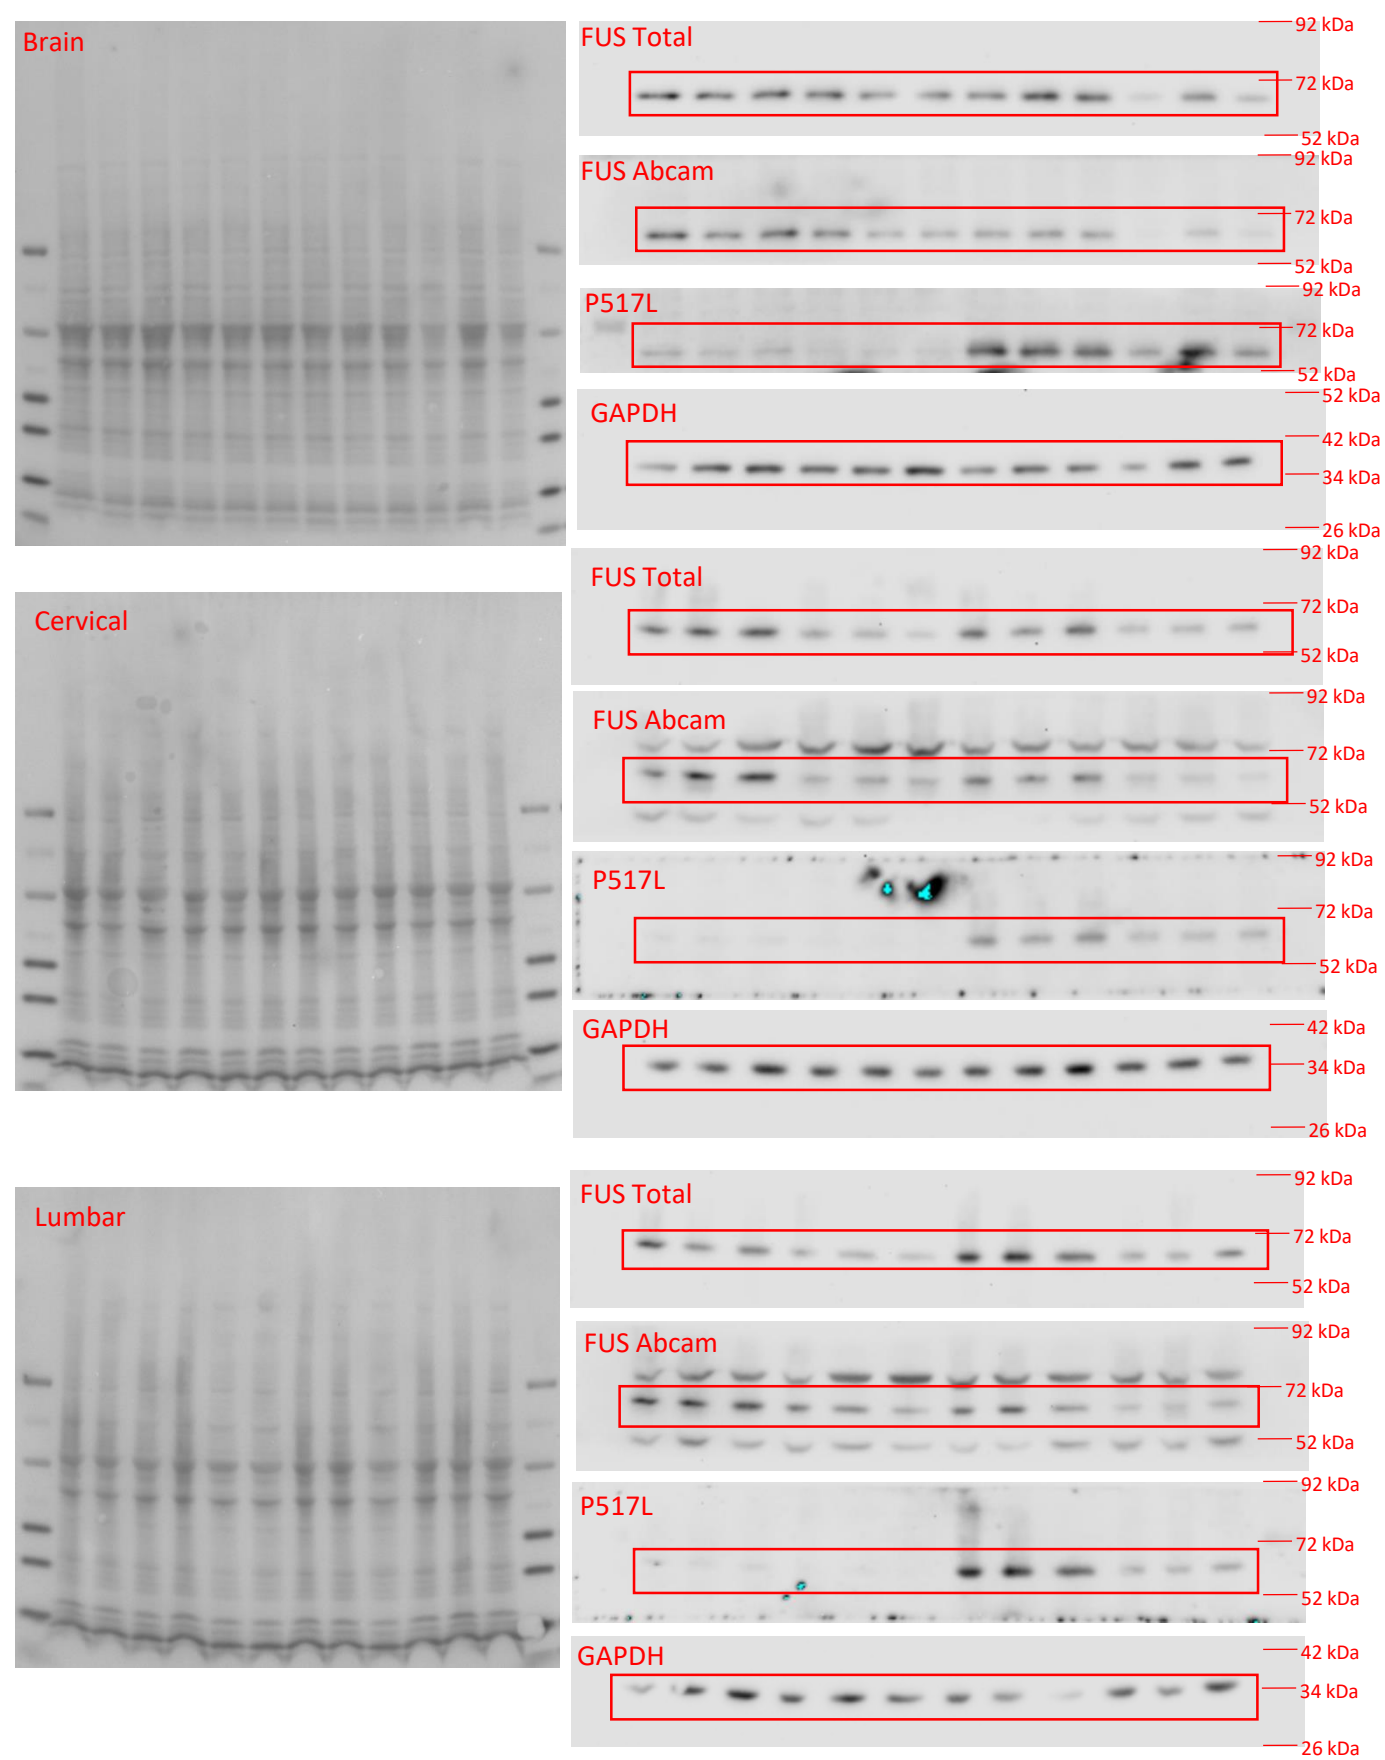

Figure 4c.

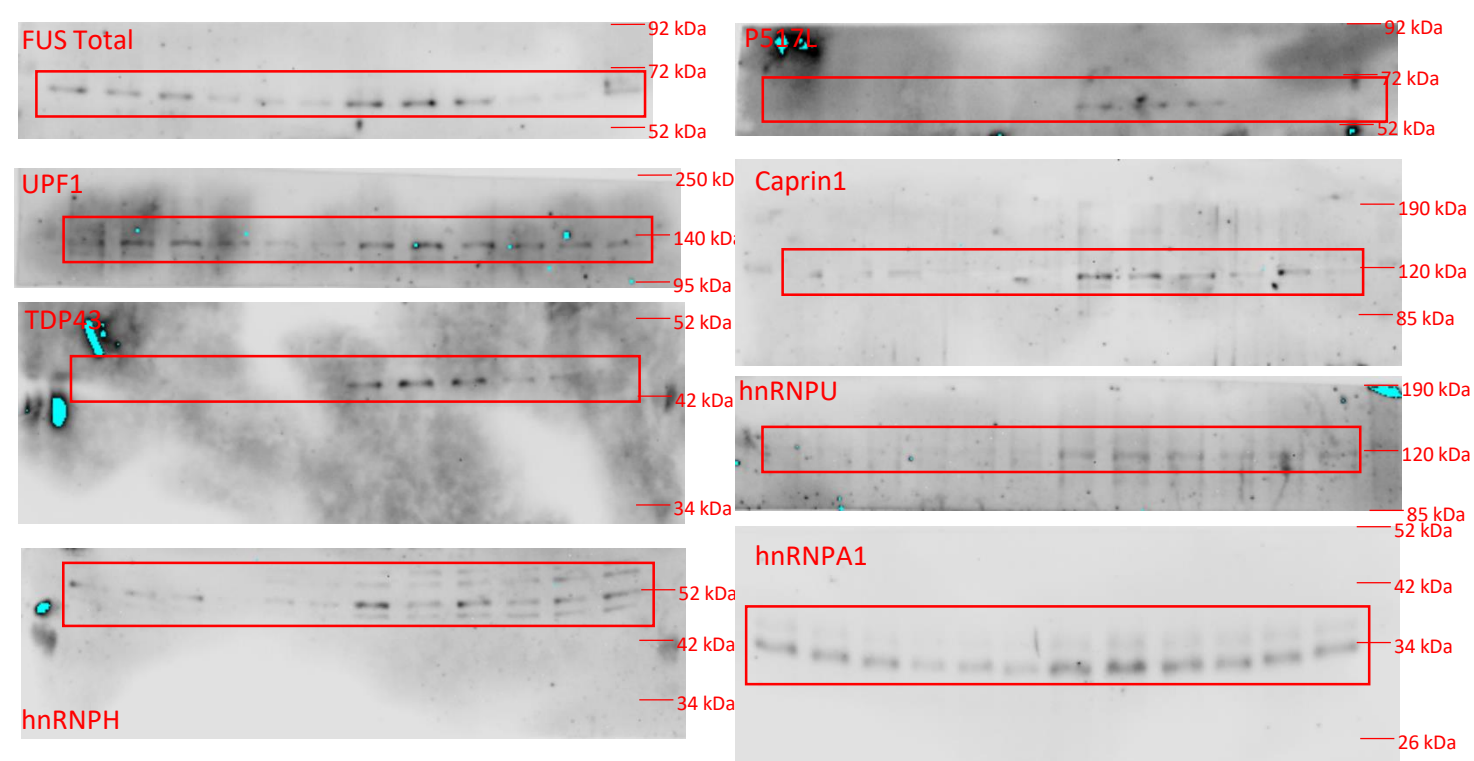

Supplement: 41591_2021_1615_MOESM5_ESM.pdf [file 41591_2021_1615_MOESM5_ESM.pdf]
